# Supplementary material for: In Vivo Microelectrode Arrays for Detecting Multi-Region Epileptic Activities in the Hippocampus in the Latent Period of Rat Model of Temporal Lobe Epilepsy
Source: MDPI journal article supplement (doi:10.3390/mi12060659), 2021-06-03
Supplement: s1 [file s1]

## Supplementary Materials

# In Vivo Microelectrode Arrays for Detecting Multi-Region Epileptic Activities in the Hippocampus in the Latent Period of Rat Model of Temporal Lobe Epilepsy

Yuchuan Dai <sup>1,2</sup>, Yilin Song <sup>1,2</sup>, Jingyu Xie <sup>1,2</sup>, Shengwei Xu <sup>1,2</sup>, Xinrong Li <sup>1,2</sup>, Enhui He <sup>1,2</sup>, Huabing Yin <sup>3</sup> and Xinxia Cai <sup>1,2,\*</sup>

<sup>1</sup> State Key Laboratory of Transducer Technology, Aerospace Information Research Institute, Chinese Academy of Sciences, Beijing 100190, China; daiyuchuan18@mails.ucas.edu.cn (Y.D.); ylsong@mail.ie.ac.cn (Y.S.); xiejingyu16@mails.ucas.ac.cn (J.X.); swxu@mail.ie.ac.cn (S.X.); lxr8118@126.com (X.L.); heenhui17@mails.ucas.ac.cn (E.H.).

<sup>2</sup> School of Electronic, Electrical and Communication Engineering, University of Chinese Academy of Sciences, Beijing 100049, China

<sup>3</sup> Division of Biomedical Engineering, University of Glasgow Room 626, Rankine Building, Oakfield Avenue, Glasgow G12 8LT, UK; Huabing.Yin@glasgow.ac.uk (H.Y.).

\* Correspondence: xxcai@mail.ie.ac.cn; Tel.: +86-10-58887193

**Citation:** Dai, Y.; Song, Y.; Xie, J.; Xu, S.; Li, X.; He, E.; Yin, H.; Cai, X. In Vivo Microelectrode Arrays for Detecting Multi-Region Epileptic Activities in the Hippocampus in the Latent Period of Rat Model of Temporal Lobe Epilepsy. *Micromachines* **2021**, *12*, 659. <https://doi.org/10.3390/mi12060659>

Academic Editor: Aiqun Liu

Received: 8 May 2021

Accepted: 30 May 2021

Published: 3 June 2021

**Publisher's Note:** MDPI stays neutral with regard to jurisdictional claims in published maps and institutional affiliations.

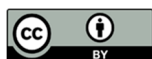

**Copyright:** © 2021 by the authors. Licensee MDPI, Basel, Switzerland. This article is an open access article distributed under the terms and conditions of the Creative Commons Attribution (CC BY) license (<http://creativecommons.org/licenses/by/4.0/>).

## Supplementary figures

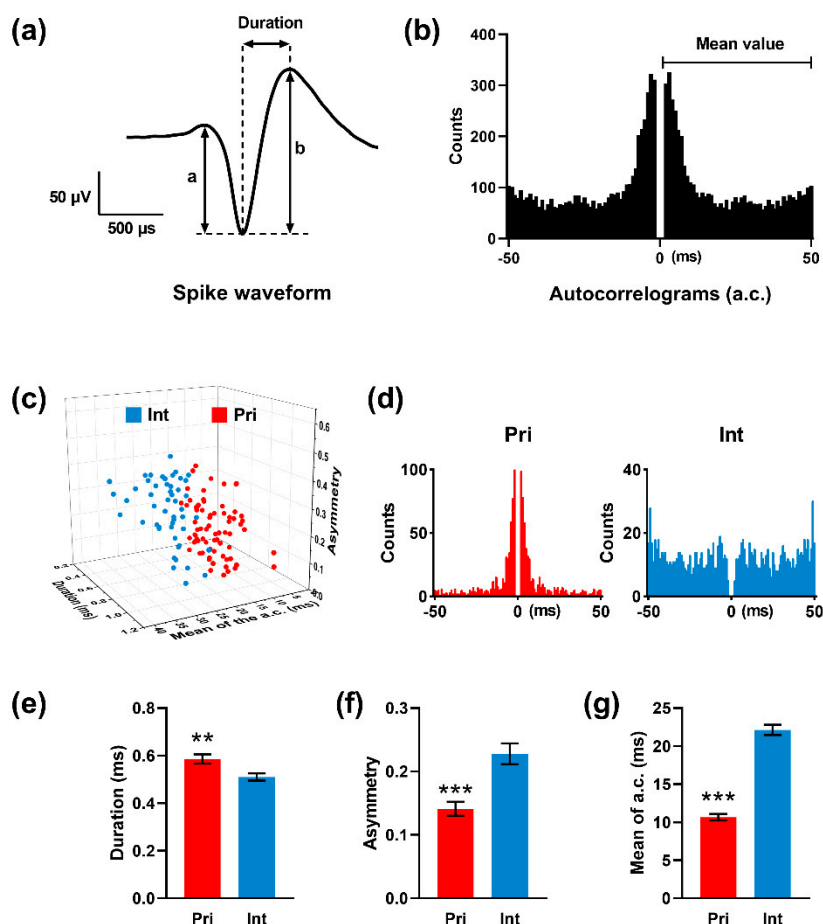

**Figure S1.** Classification of principal cells and interneurons. (a) Duration of spike waveform was the time interval between peak and valley. "a" represents the amplitude of pre-peak while "b" represents that of the post-peak. Asymmetry =  $(b-a)/(a+b)$ . (b) Mean value of autocorrelograms in 50 ms was the third parameter for classification. (c) K-means clustering with duration, asymmetry and the mean of autocorrelograms. (d) In the present study, the autocorrelograms of principal cells showed peaks at 2–5 ms, whereas those of interneurons distributed with no apparent peaks. (e) The spike durations of principal cells and interneurons were  $0.58 \pm 0.16$  ms and  $0.50 \pm 0.11$  ms, respectively. (f) The asymmetry of principal cells ( $0.14 \pm 0.09$ ) was lower than that of interneurons ( $0.23 \pm 0.12$ ). (g) The mean value of autocorrelograms of principal cells ( $10.65 \pm 3.58$  ms) in 50 ms was significantly shorter than that of interneurons ( $22.13 \pm 4.84$  ms). The results indicated that the neural spikes were successfully divided into two groups corresponding to principal cells and interneurons.  $**P < 0.01$  and  $***P < 0.001$ , unpaired *t*-test, *n* = 68 and 53 for pri and int respectively. Pri, principal cells. Int, interneurons.
